# Supplementary material
Source: PubMed Central journal article supplement (PMC3831533)
Supplement: 113.058826_ajcn058826SupplementaryData1.pdf [file 113.058826_ajcn058826SupplementaryData1.pdf]

## Online Supplemental Material

**SUPPLEMENTAL TABLE 1**

Dietary intake by food groups at Year 20, overall and by race-sex subgroups

| <b>Food groups (servings/d)</b>  | <b>Total<br/>(N = 2632)</b> | <b>White men<br/>(n = 667)</b> | <b>Black men<br/>(n = 464)</b> | <b>White women<br/>(n = 775)</b> | <b>Black women<br/>(n = 726)</b> | <b>P value<sup>1</sup></b> |
|----------------------------------|-----------------------------|--------------------------------|--------------------------------|----------------------------------|----------------------------------|----------------------------|
| Fruits                           | 2.65 ± 2.43 <sup>2</sup>    | 2.67 ± 2.56                    | 3.00 ± 2.75                    | 2.34 ± 1.89                      | 2.72 ± 2.56                      | <0.0001                    |
| Fruits                           | 1.66 ± 1.80                 | 1.61 ± 1.97                    | 1.50 ± 1.81                    | 1.79 ± 1.58                      | 1.67 ± 1.86                      | 0.0503                     |
| Fruit juices                     | 0.99 ± 1.38                 | 1.06 ± 1.43                    | 1.50 ± 1.77                    | 0.55 ± 0.84                      | 1.06 ± 1.38                      | <0.0001                    |
| Vegetables, excluding potatoes   | 3.72 ± 2.82                 | 3.89 ± 2.55                    | 3.35 ± 3.33                    | 4.35 ± 2.83                      | 3.15 ± 2.52                      | <0.0001                    |
| Green leafy                      | 0.80 ± 0.98                 | 0.79 ± 0.98                    | 0.53 ± 0.96                    | 1.04 ± 1.09                      | 0.72 ± 0.81                      | <0.0001                    |
| Dark yellow                      | 0.25 ± 0.42                 | 0.24 ± 0.35                    | 0.19 ± 0.49                    | 0.35 ± 0.50                      | 0.18 ± 0.30                      | <0.0001                    |
| Tomatoes                         | 0.54 ± 0.53                 | 0.64 ± 0.49                    | 0.48 ± 0.57                    | 0.61 ± 0.51                      | 0.40 ± 0.55                      | <0.0001                    |
| Avocados/guacamole               | 0.15 ± 0.44                 | 0.17 ± 0.42                    | 0.07 ± 0.32                    | 0.24 ± 0.60                      | 0.08 ± 0.29                      | <0.0001                    |
| Other                            | 2.00 ± 1.60                 | 2.05 ± 1.50                    | 2.08 ± 2.04                    | 2.11 ± 1.51                      | 1.77 ± 1.44                      | 0.0002                     |
| Vegetables, potatoes             | 0.46 ± 0.57                 | 0.53 ± 0.54                    | 0.64 ± 0.90                    | 0.35 ± 0.39                      | 0.40 ± 0.42                      | <0.0001                    |
| Potatoes                         | 0.29 ± 0.46                 | 0.34 ± 0.45                    | 0.35 ± 0.75                    | 0.24 ± 0.34                      | 0.24 ± 0.30                      | <0.0001                    |
| Fried potatoes                   | 0.17 ± 0.28                 | 0.19 ± 0.25                    | 0.29 ± 0.45                    | 0.11 ± 0.15                      | 0.16 ± 0.26                      | <0.0001                    |
| Grains                           | 6.59 ± 3.70                 | 7.78 ± 3.74                    | 8.22 ± 4.55                    | 5.73 ± 2.79                      | 5.36 ± 3.15                      | <0.0001                    |
| Whole grain foods                | 1.61 ± 1.50                 | 1.91 ± 1.61                    | 1.73 ± 1.75                    | 1.72 ± 1.42                      | 1.14 ± 1.17                      | <0.0001                    |
| Refined grains                   | 3.42 ± 2.45                 | 4.04 ± 2.49                    | 4.52 ± 3.10                    | 2.65 ± 1.67                      | 2.99 ± 2.22                      | <0.0001                    |
| Sweet breads                     | 0.73 ± 0.86                 | 0.80 ± 0.82                    | 1.01 ± 1.21                    | 0.61 ± 0.77                      | 0.60 ± 0.65                      | <0.0001                    |
| Salty snacks                     | 0.23 ± 0.57                 | 0.29 ± 0.46                    | 0.18 ± 0.42                    | 0.28 ± 0.79                      | 0.16 ± 0.41                      | <0.0001                    |
| Grain desserts                   | 0.59 ± 1.08                 | 0.74 ± 1.45                    | 0.78 ± 1.48                    | 0.47 ± 0.52                      | 0.48 ± 0.75                      | <0.0001                    |
| Meats and fish                   | 5.31 ± 3.48                 | 5.89 ± 3.46                    | 7.24 ± 4.41                    | 4.01 ± 2.42                      | 4.94 ± 3.10                      | <0.0001                    |
| Red meat regular                 | 1.37 ± 1.39                 | 1.70 ± 1.52                    | 2.00 ± 1.79                    | 0.94 ± 0.89                      | 1.11 ± 1.16                      | <0.0001                    |
| Red meat lean                    | 0.42 ± 0.64                 | 0.60 ± 0.76                    | 0.48 ± 0.84                    | 0.40 ± 0.54                      | 0.25 ± 0.38                      | <0.0001                    |
| Processed meats                  | 0.88 ± 0.99                 | 1.07 ± 1.04                    | 1.30 ± 1.36                    | 0.59 ± 0.65                      | 0.76 ± 0.81                      | <0.0001                    |
| Organ meats                      | 0.02 ± 0.10                 | 0.01 ± 0.08                    | 0.05 ± 0.17                    | 0.01 ± 0.05                      | 0.04 ± 0.11                      | <0.0001                    |
| Poultry                          | 1.43 ± 1.51                 | 1.40 ± 1.50                    | 1.88 ± 1.97                    | 1.15 ± 1.18                      | 1.49 ± 1.41                      | <0.0001                    |
| Fish                             | 0.02 ± 0.13                 | 0.03 ± 0.20                    | 0.03 ± 0.15                    | 0.01 ± 0.08                      | 0.01 ± 0.09                      | 0.0020                     |
| Fried (fish, chicken, shellfish) | 0.19 ± 0.52                 | 0.12 ± 0.41                    | 0.37 ± 0.80                    | 0.07 ± 0.20                      | 0.26 ± 0.59                      | <0.0001                    |
| Lean fish                        | 0.74 ± 1.07                 | 0.72 ± 1.11                    | 0.85 ± 1.14                    | 0.65 ± 0.88                      | 0.80 ± 1.14                      | 0.0037                     |

## Online Supplemental Material

|                             |             |             |             |             |             |         |
|-----------------------------|-------------|-------------|-------------|-------------|-------------|---------|
| Shellfish                   | 0.23 ± 0.49 | 0.25 ± 0.48 | 0.28 ± 0.72 | 0.19 ± 0.30 | 0.22 ± 0.50 | 0.0174  |
| Dairy                       | 2.44 ± 2.71 | 2.95 ± 2.83 | 2.14 ± 2.91 | 2.88 ± 3.06 | 1.68 ± 1.64 | <0.0001 |
| Low-fat                     | 1.32 ± 1.73 | 1.71 ± 2.27 | 1.00 ± 1.74 | 1.66 ± 1.53 | 0.79 ± 1.01 | <0.0001 |
| Whole-fat                   | 1.12 ± 1.85 | 1.24 ± 1.48 | 1.14 ± 1.64 | 1.22 ± 2.59 | 0.89 ± 1.22 | 0.0007  |
| Fats                        | 5.43 ± 5.96 | 6.18 ± 6.92 | 6.55 ± 6.42 | 4.83 ± 5.42 | 4.68 ± 4.99 | <0.0001 |
| Margarine                   | 0.86 ± 1.46 | 0.79 ± 1.29 | 1.21 ± 1.80 | 0.64 ± 1.24 | 0.93 ± 1.53 | <0.0001 |
| Oil                         | 2.52 ± 4.95 | 3.00 ± 5.91 | 2.63 ± 4.82 | 2.54 ± 4.77 | 2.00 ± 4.16 | 0.0020  |
| Butter                      | 2.05 ± 2.59 | 2.38 ± 3.30 | 2.72 ± 3.04 | 1.65 ± 1.95 | 1.76 ± 1.95 | <0.0001 |
| Beans                       | 0.25 ± 0.42 | 0.28 ± 0.50 | 0.30 ± 0.58 | 0.24 ± 0.33 | 0.20 ± 0.28 | 0.0001  |
| Eggs/omelettes              | 0.59 ± 0.76 | 0.58 ± 0.57 | 0.89 ± 1.01 | 0.49 ± 0.82 | 0.52 ± 0.60 | <0.0001 |
| Seeds, nuts, peanut butter  | 1.16 ± 2.01 | 1.31 ± 1.79 | 1.11 ± 2.31 | 1.23 ± 1.93 | 0.98 ± 2.06 | 0.0131  |
| Salad dressings/sauces      | 2.33 ± 2.08 | 2.42 ± 1.85 | 2.94 ± 2.72 | 1.90 ± 1.75 | 2.31 ± 2.03 | <0.0001 |
| Soups                       | 0.05 ± 0.09 | 0.07 ± 0.11 | 0.05 ± 0.09 | 0.06 ± 0.09 | 0.04 ± 0.06 | <0.0001 |
| Soy/non-dairy products      | 0.79 ± 2.28 | 0.64 ± 1.66 | 0.66 ± 1.93 | 0.99 ± 2.41 | 0.81 ± 2.77 | 0.0148  |
| Pickled foods               | 0.45 ± 1.17 | 0.49 ± 0.79 | 0.39 ± 0.69 | 0.50 ± 1.74 | 0.38 ± 0.92 | 0.1148  |
| Chocolate                   | 0.18 ± 0.39 | 0.23 ± 0.45 | 0.18 ± 0.40 | 0.19 ± 0.41 | 0.13 ± 0.29 | <0.0001 |
| Sweet extras                | 1.76 ± 3.60 | 1.66 ± 3.18 | 2.47 ± 5.39 | 1.25 ± 2.03 | 1.94 ± 3.74 | <0.0001 |
| Sugar substitutes           | 0.71 ± 3.06 | 0.68 ± 3.76 | 0.27 ± 1.65 | 1.10 ± 3.90 | 0.58 ± 1.66 | <0.0001 |
| Beverages                   | 4.61 ± 3.58 | 6.00 ± 4.04 | 4.30 ± 3.73 | 4.98 ± 3.32 | 3.14 ± 2.58 | <0.0001 |
| Sugar-sweetened soft drinks | 0.86 ± 1.50 | 0.78 ± 1.39 | 1.50 ± 1.89 | 0.37 ± 0.99 | 1.04 ± 1.60 | <0.0001 |
| Diet soft drinks            | 0.65 ± 1.67 | 0.95 ± 2.12 | 0.34 ± 1.57 | 0.93 ± 1.75 | 0.28 ± 0.86 | <0.0001 |
| Coffee                      | 1.47 ± 2.11 | 2.15 ± 2.57 | 0.87 ± 1.76 | 1.85 ± 2.18 | 0.81 ± 1.34 | <0.0001 |
| Tea                         | 0.69 ± 1.50 | 0.80 ± 1.96 | 0.37 ± 0.77 | 0.97 ± 1.69 | 0.50 ± 0.98 | <0.0001 |
| Meal replacement drinks     | 0.13 ± 0.52 | 0.17 ± 0.53 | 0.30 ± 0.86 | 0.05 ± 0.27 | 0.08 ± 0.37 | <0.0001 |
| Beer                        | 0.30 ± 0.83 | 0.52 ± 1.04 | 0.52 ± 1.08 | 0.14 ± 0.40 | 0.15 ± 0.66 | <0.0001 |
| Liquor                      | 0.20 ± 0.84 | 0.22 ± 0.59 | 0.29 ± 1.33 | 0.19 ± 0.76 | 0.14 ± 0.67 | 0.0158  |
| Wine                        | 0.30 ± 0.71 | 0.41 ± 0.86 | 0.11 ± 0.37 | 0.49 ± 0.86 | 0.13 ± 0.44 | <0.0001 |

<sup>1</sup> Omnibus ANOVA *P* value for intake by race-sex subgroups.

<sup>2</sup> Mean ± standard deviation.
